1 Title: **Relationships between landscape structure and the prevalence of two tick-borne infectious**  
2 **agents, *Anaplasma phagocytophilum* and *Borrelia burgdorferi* sensu lato, in small mammal**  
3 **communities**

4

5 Running title:

6 **Landscape structure and prevalence of two tick-borne infections in small mammals**

7

8 Authors:

9 **Grégoire Perez<sup>1, 2, \*</sup>**

10 **Suzanne Bastian<sup>2</sup>**

11 **Amélie Chastagner<sup>3, 4, §</sup>**

12 **Albert Agoulon<sup>2</sup>**

13 **Yann Rantier<sup>1</sup>**

14 **Gwenaél Vourc'h<sup>3</sup>**

15 **Olivier Plantard<sup>2</sup>**

16 **Alain Butet<sup>1</sup>**

17

18 <sup>1</sup> UMR CNRS 6553–université de Rennes 1, ECOBIO, Campus de Beaulieu, 35042 Rennes, France

19 <sup>2</sup> BIOEPAR, INRA, Oniris, 44307, Nantes, France

20 <sup>3</sup> EPIA, INRA, VetAgro Sup, 63122 Saint-Genès-Champanelle, France

21 <sup>4</sup> Evolutionary Ecology Group, University of Antwerp, Campus Drie Eiken, Universiteitsplein 1, 2610

22 Wilrijk, Belgium

23 \* Corresponding author. E-mail: [perez.gregoire@gmail.com](mailto:perez.gregoire@gmail.com)

24 ORCID : 0000-0001-8861-4856

25 § Current address: ANSES, Laboratoire de Ploufragan-Plouzané, 22440 Ploufragan, France

26

27

28

29

30 **Abstract**

31 *Context*

32 By modifying ecosystems, land cover changes influence the emergence and the incidence of vector-  
33 borne diseases.

34 *Objective*

35 We aimed to identify the relationships between the prevalence of two tick-borne infectious agents,  
36 *Anaplasma phagocytophilum* and *Borrelia burgdorferi* s.l., in small mammal communities and the  
37 landscape structure.

38 *Methods*

39 Small mammals were sampled in 24 sites along a gradient of woodland fragmentation and hedgerow  
40 network density, and screened for infectious agents with rt-PCR techniques. Functional variables of  
41 wooded habitats connectivity based on graph theory and least cost path distances for the two dominant  
42 species, Bank voles (*Myodes glareolus*) and Wood mouse (*Apodemus sylvaticus*), as well as structural  
43 variables (composition and configuration) of the surrounding landscape at various scales (50-500 m)  
44 were computed for each site.

45 *Results*

46 The *A. phagocytophilum* prevalence increased with wooded habitats cover (50-500 m), which is  
47 explained by host population size, and increased also slightly with Bank vole abundance, which has a  
48 higher reservoir competence than Wood mouse. The *B. burgdorferi* s.l. prevalence only locally  
49 increased with wooded ecotones (50-100 m). Wooded habitats connectivity measures did not improve  
50 models built with simple land cover variables. A more marked spatial pattern was observed for the  
51 prevalence of *A. phagocytophilum* than *B. burgdorferi* s.l..

52 *Conclusions*

53 This study highlights the interest of considering together the life traits of infectious agents (e.g. host  
54 specificity) and the host species community ecology to better understand the influence of the  
55 landscape structure on the spatial distribution of vector-borne infectious agents.

56

57 **Keywords**

58 Tick-borne diseases; Small mammal community; Landscape connectivity; Graph theory; Least cost  
59 paths

60

61

## 62 **Introduction**

63 Landscape changes are suspected to cause infectious disease emergence or reemergence worldwide  
64 (Jones et al. 2008). Several authors depicted the complexity of the interactions between the landscape,  
65 hosts, vectors and humans, which drive the emergence of these diseases (reviewed in Lambin et al.  
66 2010). The spread of infectious agent in ecosystems relies partly on their life history traits shaped by  
67 their evolutionary histories (e.g. transmission modalities). Thus, because species within communities  
68 exhibiting various levels of reservoir or vector competence, it relies on hosts and vectors diversity and  
69 abundance (Keesing et al. 2009).

70 Landscape heterogeneity (composition and configuration) and habitat connectivity, by filtering and  
71 regulating richness, abundance and dispersal of species in hosts and vectors communities, may  
72 influence the transmission rate and the diffusion of infectious agents, which ultimately determine their  
73 prevalence and distribution (Suzán et al. 2015). For instance, an increase in the proportion of non-  
74 reservoir host species may induce an increased number of missed transmissions from reservoir hosts,  
75 or an increased number of wasted bites by vectors for vector-borne diseases. This may reduce the  
76 number of transmission events which may have a so called “dilution effect” on prevalence (Ostfeld  
77 and Keesing 2000; Clay et al. 2009). Conversely, an increased number of competent host species may  
78 increase the number of transmission events or efficient bites by vectors (Roche et al. 2013). When less  
79 competent species are more prone to local extinction, this non-random species loss in host  
80 communities seems to be a driver of the increased direct and vector-borne infectious disease  
81 transmission (Ostfeld and LoGiudice 2003; Johnson et al. 2013; Roche et al. 2013).

82 Habitat connectivity partly shapes the host community structure. Large-bodied species, with small  
83 clutch/litter size and long gestation/incubation time are supposed to be more sensitive to habitat  
84 fragmentation because they experience higher local extinction risk. Conversely, small-bodied species,  
85 with large clutch/litter size and short incubation/gestation time can persist in fragmented habitat  
86 landscapes. These species need less habitat surface and benefit from a competition and predation  
87 release in these landscapes that are less favorable to predators and specialist species (Nupp and  
88 Swihart 1998, 2000; Gehring and Swihart 2003; Ferrante et al. 2017). As it happens, the latter kind of  
89 species also seem to be better reservoirs for infectious agents (Gottdenker et al. 2012; Huang et al.  
90 2013; Ostfeld et al. 2014). Thus, in fragmented habitat landscapes, one could expect an amplification  
91 of infectious diseases supported by a higher density of highly competent hosts (Allan et al. 2003;  
92 Rubio et al. 2014). However, habitat connectivity can also indirectly influence the risk of local  
93 extinction of infectious agents by shaping hosts – and vectors – population size, as demonstrated on  
94 Hantavirus in Bank voles (Guivier et al. 2011). Thus, more studies explicitly assessing the  
95 relationships between land cover composition and configuration, landscape habitat connectivity, the  
96 communities of hosts, vectors, and infectious agents, and their interactions are needed for a better  
97 assessment of the effects of land use changes on infectious disease risk.

98 Ticks are obligate hematophagous arachnids vectors of infectious agents responsible of diseases of  
99 medical and veterinary importance (Jongejan and Uilenberg 2005). To complete their life cycle, hard  
100 ticks need one blood meal on a vertebrate host to molt from larva to nymph, and a second to molt from  
101 nymph to adult. Adult females need a third one to produce eggs fertilized by adult males. Tick-borne  
102 infectious agents can be acquired by ticks or transmitted to hosts at each blood meal. Such systems are  
103 interesting to study the influence of land cover and habitat connectivity on the distribution of  
104 infectious agents. As non-flying arthropods, tick displacements *per se* are reduced and their dispersal  
105 occurs while feeding on their hosts. Tick-borne infectious agents disperse either by the dissemination  
106 of ticks getting infected by feeding on infected hosts, or by the dispersal of already infected ticks while  
107 attached on hosts at the subsequent blood meal. Thus, their dispersal distance depends on the home  
108 range and competence of tick hosts (Kurtenbach et al. 2002b).

109 Small mammals are important reservoir hosts of many tick-borne infectious agent taxa: protozoan (e.g.  
110 *Babesia* sp., Hersh et al. 2012), bacteria (e.g. *Borrelia* sp., Gern et al. 1998; *Anaplasma* sp., Stuen et  
111 al. 2013) and viruses (e.g. tick-borne encephalitis virus, Mansfield et al. 2009). Small mammal  
112 communities composition is known to vary according to landscape features like habitat patch size,  
113 shape and isolation (Nupp and Swihart 2000; Michel et al. 2006) and small mammals displacements to  
114 be constrained by the landscape matrix (Szacki et al. 1993).

115 In this study, we searched for two infectious agents, *Anaplasma phagocytophilum* and *Borrelia*  
116 *burgdorferi* sensu lato (s.l.). The *A. phagocytophilum* bacteria ecotype associated to small mammals  
117 are apparently transmitted mostly by *Ixodes trianguliceps* and maybe other endophilic (i.e. burrow  
118 dwelling) tick species (Bown et al. 2009; Blaňarová et al. 2014; Jahfari et al. 2014). Infection in small  
119 mammals is short-lived, for about a couple of months post-infection (Bown et al. 2003). No  
120 transovarial transmission (i.e. from engorged females to their offspring) of these bacteria is known in  
121 *Ixodes* ticks (Stuen et al. 2013).

122 In Europe, several genospecies of the *B. burgdorferi* s.l. complex can be hosted by small mammals:  
123 *B. afzelli*, *B. bavariensis* (formerly *garinii* OspA serotype 4 strain), *B. bissetti*, *B. burgdorferi* sensu  
124 stricto (s.s.), and *B. spielmani* (Kurtenbach et al. 2002a, 2006; Margos et al. 2009; Coipan and Sprong  
125 2016). However, host ranges of some of these genospecies include also larger mammals like  
126 hedgehogs (*Erinaceus europaeus*) and squirrels (*Sciurus vulgaris*) (Skuballa et al. 2012; Pisanu et al.  
127 2014). The *B. burgdorferi* s.l. bacteria can be transmitted by several tick species, but the exophilic (i.e.  
128 questing for host on the vegetation) tick species *I. ricinus* is assumed to be its main vector in Europe  
129 (Rizzoli et al. 2011). Small mammals are major hosts for *I. ricinus* larvae and only occasional hosts for  
130 nymphs, but they also host endophilic tick species like *I. trianguliceps* and *I. acuminatus* at all life  
131 stages (Boyard et al. 2008; Bown et al. 2008; Hofmeester et al. 2016; Perez et al. 2017). Therefore, the  
132 maintenance of the zoonotic cycle of these bacteria may partly rely on other tick species (Hubbard et  
133 al. 1998; Heylen et al. 2013; Szekeres et al. 2015). Infections in small mammals are lifelong (Gern et

134 al. 1994; Humair et al. 1999). Transovarial transmission is assumed to be null or rare (Rollend et al.  
135 2013).

136 Here, we investigated at a local scale how landscape composition, configuration and connectivity  
137 directly, or *via* relationships with host species abundances, can explain the spatial variation of  
138 *A. phagocytophilum* and *B. burgdorferi* s.l. prevalence in small mammals. We specifically tested the  
139 three following hypothesis on the prevalence drivers:

140 (H1) Host population size: prevalence would be higher in the more connected wooded habitats  
141 patches, larger patches and/or patches with more surrounding wooded habitats, which ones support  
142 larger populations.

143 (H2) Overall small mammal community competence: the landscape would indirectly influence  
144 prevalence by acting on the relative abundances of species with different reservoir competence,  
145 modifying the overall community competence (leading to dilution or amplification).

146 (H3) Infectious agents specificity: a stronger relationship of prevalence with the landscape  
147 variables would be observed for *A. phagocytophilum*, for which the small mammal ecotype is specific,  
148 than for *B. burgdorferi* s.l., which show a wider range of host and of vector species.

149

## 150 **Materials and Methods**

### 151 *Study area*

152 The study took place in the ‘Zone Atelier Armorique’ (Brittany, France), a 132 km<sup>2</sup> Long-Term  
153 Ecological Research (LTER) area labeled by the CNRS (‘Centre National de la Recherche  
154 Scientifique’) and belonging to the International LTER network. The ‘Zone Atelier Armorique’  
155 includes different landscapes with various land use, from deciduous mixed forest, to livestock-crop  
156 mixed farming landscapes, to cereal-oriented farming open landscapes. Compared to the livestock-  
157 crop mixed farming landscapes, the open landscapes have more crops (mainly maize and cereals) and  
158 fewer grasslands, larger patches (mean 2.3 ha compared to 1.3 ha), fewer and smaller woodlots, and a  
159 looser hedgerow network (Michel et al. 2007).

160

### 161 *Sampling strategy*

162 Wooded habitats support higher abundances of small mammals, better abiotic conditions for ticks (i.e.  
163 moisture) and are as such supposed to be key habitats for small mammals-ticks interactions (Boyard et  
164 al. 2008). For these reasons, 24 sampling sites were selected in wooded habitat patches in various  
165 contexts of land use and habitat connectivity (the exact locations are available in Perez et al. 2016).  
166 The 24 sampling sites at least 500 m apart from each other to ensure their spatial independence, were  
167 distributed as follows: 6 in the forest core; 6 in forest edge landscapes; 6 in the mixed farming

168 landscapes; and 6 in the open farming landscapes. In each of the two agricultural landscape types, 3  
169 sites were selected along hedgerows (6 sites overall) and 3 along woodlots edges (6 sites overall). At  
170 forest edges and in agricultural landscapes, the sampling sites (n = 18) were selected at the ecotone  
171 between wooded habitats and grasslands, as meadows are expected to be more favorable to ticks than  
172 more disturbed cultivated plots. Because small mammals start breeding in spring and populations peak  
173 generally in autumn, we sampled in May-June and in October in 2012 and 2013. These periods also  
174 correspond to the main and the secondary abundance peak of *I. ricinus* nymphs, respectively, and  
175 conversely for *I. trianguliceps* adult females, while the nymphs of this latter species are active mainly  
176 through summer and until October (Randolph 1975a).

177

#### 178 *Small mammal sampling and ethic statement*

179 Small mammals were trapped using French model (INRA) live traps with wooden dormitory boxes.  
180 These traps can catch small mammals from 4 to 40 grams, including shrews and small rodents. Trap  
181 lines (100 m long) were constituted of 34 traps (3 m one apart from each other) baited with a mix of  
182 commercial seeds for pet rodents (sunflower, wheat, etc.), dry cat food, and a piece of apple for water  
183 supply. Traps were checked at the morning after 24 and 48 hours. Animals were brought to the field  
184 lab to be identified at the species level, euthanized by pentobarbital injection, weighted, sexed and  
185 dissected.

186 Traps were designed to limit as much as possible the stress or injury of the animals. The bait was  
187 designed to obtain an optimal catch rate across small mammal species and a good survival of  
188 individuals. The targeted animals were not protected species and thus no special authorization was  
189 needed, according to the French law in force. All individuals were euthanized by authorized  
190 experimenters according to current French law and to the European guidelines on the use of animals in  
191 science (Close et al. 1997).

192

#### 193 *Molecular detection of infectious agents*

194 DNA was extracted from small mammal ear and spleen samples with Macherey-Nagel NucleoSpin  
195 Tissue kits (Chastagner et al. 2016). The screening for *A. phagocytophilum* was performed on DNA  
196 extracts from small mammal spleens by real-time PCR targeting the *msh2* genes according to the  
197 protocol of Courtney et al. (2004). The screening for *B. burgdorferi* s.l. was performed on DNA  
198 extracts from small mammal ears by real-time PCR in SybrGreen according to the protocol of Halos et  
199 al. (2010). The *B. burgdorferi* s.l. prevalence was low and, for technical reasons, all geno-species  
200 (genetically discriminated *Borrelia* species) could not be identified (data not shown). Thus, all the  
201 *B. burgdorferi* s.l. genospecies were combined hereafter. Although all geno-species which can infect  
202 small mammals do not share the same host range, we assumed that this simplification did not bias our

203 results, because *B. afzelii* is known to be predominant in the studied species (Kurtenbach et al. 2002a;  
204 Marsot et al. 2013). In the present study, as temporal variation of prevalence has been studied  
205 elsewhere (Perez et al. 2017), we summed the data from all the sampling sessions for each site to  
206 consider only the spatial variations hereafter.

207

#### 208 *Landscape data*

209 The used landscape data were: a land cover shape file of the year 2012 kindly provided by the 'LETG-  
210 COSTEL-Rennes' lab *via* the 'Zone Atelier Armorique'; a road network shape file provided by the  
211 'Institut National de l'Information Géographique et Forestière' (IGN); and a 5 m-resolution raster land  
212 cover file of the 2010 year from Gil Tena et al. (2014) for woodland and hedgerows. The land covers  
213 were characterized as "woodland", "hedgerows" (abandoned lands and hedgerows extracted from the  
214 5 m-resolution raster file), "grassland", "crops", "roads" (ranked according to the 'road importance  
215 index' of the 'IGN'), "urban areas" and "water areas". All files were aggregated into a single 5 m-  
216 resolution raster file that was used to create resistance maps and to compute metrics. This work was  
217 performed with ArcGIS 10.3.1 for Desktop, Esri ®.

218

#### 219 *Landscape functional connectivity*

220 The dispersal of the two studied infectious agents is known to be mostly realized by larval ticks, which  
221 acquire them by feeding on infected adult small mammal hosts and falling off in the latter's home  
222 ranges. The dispersal of infectious agents by young small mammal hosts, which have not yet been  
223 highly exposed to ticks and thus are unlikely yet infected, can be considered as negligible (Randolph  
224 1975b; Sinski et al. 2006; Kallio et al. 2014; Perez et al. 2017). Furthermore, despite *I. ricinus* nymphs  
225 can disperse bacteria on longer distances attached on other hosts with larger home ranges, small  
226 mammals are unlikely to be infected by *I. ricinus* adult females because they rarely host them. For  
227 these reasons, we selected for the functional connectivity analysis the spatial scale corresponding to  
228 the home range of adult small mammals.

229 Land cover cost files were built only for the two dominant rodent species with contrasted habitat  
230 preference: Wood mice and Bank voles (Boyard et al. 2008). Because these species move  
231 preferentially along linear structures or across the shortest path between suitable habitat patches  
232 (Zhang and Usher 1991), the functional distance between two habitat patches was set using least cost  
233 path distance. For "woodland", "grassland" and "crops", the resistance costs were assigned like the  
234 inverse of the relative species abundance from the literature (Ouin et al. 2000; Tattersall et al. 2002;  
235 Boyard et al. 2008; Vourc'h et al. 2008). A maximum resistance value of 100 was assigned arbitrary to  
236 "water areas" and "buildings". Roads are poor habitats for small mammals because they impede their  
237 displacements (Mader 1984; Rico et al. 2007). They also cause a traffic-related mortality (Ruiz-

238 Capillas et al. 2015). ESKILKDSen (2010) reported that finding bank voles were 15 times less likely on  
239 the opposite side of a barrier (forest path or road) than on the same side. Thus, a gradient of resistance  
240 indices from 15 (countryside and forest tracks) to 75 (expressways) was arbitrary assigned to “roads”  
241 according to the ‘road importance index’. Resistance coefficients for each land cover are summarized  
242 in **Table 1**.

243 The median distance travelled by an individual was modelled using negative exponential functions  
244 based on data from the same landscapes, Papillon et al (Papillon et al. 2002), and from a forest  
245 landscape of the Berkshire, United-Kingdom (Kikkawa 1964). In consistency with the lower mobility  
246 of the Bank vole compared to the Wood mouse, these distances were 100 m and 25 m, respectively  
247 (Zhang and Usher 1991). The nodes were defined as patches with an area of at least 0.025 ha, that  
248 corresponds to the minimum home range size of the studied species (Kikkawa 1964).

249 Graphs were created for each least cost path networks (i.e. for each species) and for different Euclidian  
250 distances (25 m, 50 m, 100 m, and 250 m), which represent an ‘isolation by distance’ only model.  
251 Nodes were adjacent woodland habitats patches (“woodland” and “hedgerows”). Connectivity  
252 measures were computed at the patch level for each graph. The measure was the difference in  
253 Probability of Connectivity (‘dPC’), which is based on a negative exponential function (Saura and  
254 Pascual-Hortal 2007). Because of the high number of considered nodes (3 819), dPC values were very  
255 small and thus were multiplied by  $10^6$ . As this connectivity index is dependent on the patch surface  
256 itself (intra-patch connectivity; range: 0.025 – 212 ha), this variable was also used as a reference  
257 connectivity measure (i.e. no inter-patch displacement/dispersal). Because habitat patch areas and dPC  
258 values were over-dispersed, those variables were log-transformed hereafter. Least cost paths, graphs,  
259 and connectivity measures were computed using Graphab 1.2.3 (Foltête et al. 2012). An example of  
260 resulting graphs is shown in **Figure 1**.

261

### 262 *Landscape composition and configuration*

263 To evaluate the relationship between each landscape variable and the prevalence of infectious agents  
264 or small mammal species abundance at various spatial scale, they were computed in circular zones of  
265 different size around trap-line centres with Chloé2012 software (Boussard and Baudry 2014). The  
266 radius distances corresponded to twice the median Euclidian distances used for the ‘isolation by  
267 distance only’ model described above (i.e. 50 m, 100 m, 200 m, and 500 m). Because eighteen sites  
268 had similar local configuration (wooded habitat-grassland ecotones) and the first 50 m zones around  
269 each 100 m trap-line centre were not informative, we added this distance. The landscape composition  
270 variable ‘Wooded’ was computed as the proportion of “woodland”/“hedgerows” pixels. This variable  
271 is representative of the amount of permanent – wooded – habitat in the surrounding landscape  
272 (wooded habitats hereafter). the landscape configuration variable ‘Ecotones’ was computed as the  
273 proportion of ‘wooded habitat’ and “grassland”/“crops”/“roads” pixel couples. Such ecotones are



274 known to be favorable for most small mammal species (Meunier et al. 1999; Ouin et al. 2000; Boyard  
275 et al. 2008). For an equal amount of permanent habitat, this latter variable is also an index of  
276 landscape fragmentation. A summary of all the landscape variables is shown in **Table 2**.

277

### 278 *Data analyses*

279 To determine whether prevalence in Wood mouse and Bank vole should be modelled separately, we  
280 first tested, for both infectious agents, the correlation between prevalence and the correlation between  
281 numbers of infected individuals of each of the two species. Because of the non-normal distribution of  
282 prevalence data (Shapiro-Wilk test:  $p < 0.05$ ), we used Spearman's correlation tests.

283 To assess indirect effects of landscape structure on prevalence *via* the abundances of small mammal  
284 species, the relationship between these latter and landscape variables was tested. First, to determine  
285 whether Wood mouse and Bank vole abundances could be modelled separately, their correlation was  
286 tested through Pearson's correlation test. Then, to choose the most appropriate error distribution of  
287 species abundances, AICc values of the null models fitted with a normal error distribution and with a  
288 Poisson error distribution were compared. The normal error distribution had a better support (lower  
289 AICc-value) for Wood mouse abundance (AICc-normal = 180.2, AICc-Poisson = 232.0) and for Bank  
290 vole abundance (AICc-normal = 141.6, AICc-Poisson = 154.9). Species abundances were thus  
291 modelled using Linear Models (LMs). The set of explanatory landscape variables is summarized in  
292 **Table 2**. The variables were first selected in single explanatory variable models ( $p < 0.1$ ). Then,  
293 multiple explanatory variable LMs were built with the selected variables. To avoid collinearity  
294 problems, we excluded models with correlated variables ( $|r| > 0.5$ ). The models were then ranked  
295 based on the Akaike Information Criterion corrected for finite sample size (AICc; Hurvich and Tsai  
296 1989), and the significance of the variables in the best models ( $\Delta\text{AICc} < 2$ ) was evaluated with type II  
297 ANOVAs ( $p < 0.05$ ).

298 To assess whether tick-borne infectious agents were related to landscapes variables or species  
299 abundances, prevalence in small mammals of each infectious agent per site was modelled using  
300 binomial Generalized Linear Models (GLMs) with the same explanatory landscape variables as above,  
301 the Wood mouse abundance (N.As), Bank vole abundance (N.Mg), and the Bank vole/Wood mouse  
302 abundances ratio (ratio.Mg:As). Abundances were expressed as the total number of captured  
303 individuals per site. The variables were first selected in single explanatory variable models ( $p < 0.1$ ).  
304 Then, multiple explanatory variable GLMs were built with the selected variables. The same AICc-  
305 based model ranking and variable significance evaluation as described above was performed on each  
306 variable set ( $p < 0.1$ ). A selection and a variables significance evaluation was finally performed on  
307 multiple explanatory GLMs with the selected landscape and species abundances variables ( $p < 0.05$ ).

308 All statistical analyses were performed using R software (R Development Core Team 2014). The R-  
309 package ‘car’ was used for ANOVAs, ‘MuMIn’ for model selections, and ‘psych’ for pairwise  
310 correlation tests between explanatory variables. The absence of autocorrelation in the dependent  
311 variables was checked using the ‘correlog’ function of the ‘nfc’ R-package.

312

### 313 **Results**

314 A total of 612 small mammals belonging to five species were caught during the two sampling years  
315 (see **Table 3** for detailed results; the whole data set is available in supplementary material). The Wood  
316 mouse (*Apodemus sylvaticus*) and the Bank vole (*Myodes glareolus*) were largely dominant (i.e.  
317 74.2% and 24.3% of all animals caught, respectively) and found in all the 24 sites. We captured three  
318 other species at seven sites: the Field vole (*Microtus agrestis*; 3 sites, 4 individuals captured), the  
319 Common pine vole (*Microtus subterraneus*; 2 sites, 2 individuals captured) and the Crowned shrew  
320 (*Sorex coronatus*; 3 sites, 3 individuals captured). Four species (all but the Common pine vole)  
321 occurred only in one forest core site.

322 The Wood mouse abundance and the Bank vole abundance were not correlated ( $p = 0.281$ ,  $\rho =$   
323  $0.229$ ) and thus have been analysed separately hereafter. We found that the best model for the Wood  
324 mouse abundance included the proportion of ecotones in 500 m-radius zones ( $R^2 = 0.290$ ,  $p = 0.003$ )  
325 with a positive relationship. The Bank vole abundance was not significantly related to any landscape  
326 variable ( $p > 0.05$ ).

327

#### 328 *Results for A. phagocytophilum*

329 The analyses of *A. phagocytophilum* prevalence were based on the PCR results for 452 wood mice,  
330 147 bank voles, 4 field voles, 2 common pine voles, and 3 crowned shrews. Twenty wood mice,  
331 twenty bank voles and two crowned shrews were positive (**Table 3**). The number of positive wood  
332 mice and bank voles per site were significantly correlated ( $p = 0.038$ ,  $\rho = 0.425$ ). However, the  
333 prevalence were not ( $p = 0.177$ ,  $\rho = 0.291$ ). The results of the selection procedure of the GLMs of  
334 *A. phagocytophilum* prevalence as a function of the landscape variables and the abundances of the two  
335 dominant species are detailed in **Table 4**.

336 The most supported GLM of *A. phagocytophilum* prevalence in all small mammals included the  
337 proportion of wooded habitats in 50 m-radius zones, which displayed a significant positive  
338 relationship (**Figure 2a**). This model also included the Bank vole abundance, which also displayed a  
339 significant positive relationship with the prevalence (**Figure 2b**).

340 For wood mice separately, the most supported GLM of *A. phagocytophilum* prevalence included the  
341 proportion of wooded habitats in 50 m-radius zones, which displayed a significant positive

342 relationship (**Figure 2c**). This model also included the Bank vole abundance, which also displayed a  
343 positively relationship, but not significantly ( $p = 0.073$ ; **Figure 2d**). The ratio between the Bank vole  
344 abundance and the Wood mouse abundance was significantly positively related to the prevalence in  
345 wood mice in the univariate model (not shown).

346 Finally, the most supported GLM of *A. phagocytophilum* prevalence in bank voles included the  
347 proportion of wooded habitats in 50 m-radius zones, the proportion of ecotones in 200 m-radius zones,  
348 and the bank vole abundance. Those three variables displayed significant positive relationships with  
349 the prevalence (**Figure 2e, 2f, and 2g** respectively).

350

351 *Results for B. burgdorferi s.l.*

352 The analyses of *B. burgdorferi* s.l. prevalence were based on the PCR results for 450 wood mice, 147  
353 bank voles, 4 field voles, 2 common pine voles, and 3 crowned shrews. Fifteen wood mice, ten bank  
354 voles and one common pine vole were positive (**Table 3**). The numbers of positive wood mice and  
355 bank voles per site was not significantly correlated neither was the prevalence ( $p > 0.05$ ). The results  
356 of the selection procedure of the GLMs of *B. burgdorferi* s.l. prevalence as a function of the landscape  
357 and small mammal species abundances variables are detailed in **Table 5**.

358 For all small mammals, the most supported GLM of *B. burgdorferi* s.l. prevalence included the  
359 proportion of ecotones in 50 m-radius zones, which displayed a significant positive relationship  
360 (**Figure 3a**). No other variable was significant.

361 When considering *B. burgdorferi* s.l. prevalence in each species separately, no landscape variable  
362 displayed a significant relationship for wood mice. For bank voles, the most supported GLM of this  
363 prevalence included the proportion of ecotones in 100 m-radius zones (**Figure 3b**), which displayed a  
364 positive relationship, while the proportion of wooded habitats in 50 and 100 m-radius zones also  
365 displayed a significant relationship, but negatively. No species abundances variable was significantly  
366 related to any of the prevalence.

367

## 368 **Discussion**

369 The small mammal community at the woodland/hedgerows-grassland ecotones or in forest sites was  
370 dominated by two rodent species, the Wood mouse and the Bank vole. These two species responded  
371 differently to the landscape structure, and so are interesting to compare at this landscape scale. The  
372 Wood mouse abundance was significantly correlated to the proportion of ecotones at the largest scale  
373 considered (500 m), which is consistent with the propensity of this generalist species to use  
374 complementary various habitats (Tew and Macdonald 1994; Ouin et al. 2000). Conversely, no  
375 landscape variable was related to the Bank vole abundance. According to several studies (Szacki 1987;

376 Paillat and Butet 1996; Michel et al. 2007; van Apeldoorn et al. 2012), one could have expected a  
377 relationship between the woodland habitats connectivity and the abundance of this species,  
378 counterintuitively with an increased density in isolated patches, but not detected even with complex  
379 habitat connectivity measures.

380

#### 381 *Prevalence of Anaplasma phagocytophilum*

382 The numbers of positive individuals as well as the prevalence rate in wood mice and bank voles were  
383 correlated, suggesting a common infection factor and/or an increased exposition of one species in the  
384 presence of the other. We observed a higher prevalence in bank voles and a positive, despite weak,  
385 relationship of the abundance of bank voles with the prevalence, in all small mammals and by species  
386 separately. Although not related to landscape variables, these results support an effect of relative host  
387 species abundances on prevalence (**H2**): Bank vole acts likely as an amplification host species for the  
388 transmission of these bacteria, while Wood mouse acts, comparatively, rather as a dilution host species  
389 (Rosso et al. 2017; Perez et al. 2017).

390 Several studies demonstrated that the prevalence of directly transmitted infectious agents decreased  
391 with host population size or isolation as a consequence of a higher local extinction risk (Begon et al.  
392 2003; Guivier et al. 2011). Here, *A. phagocytophilum* prevalence, for all small mammals and by  
393 species separately, was positively related to the proportion of wooded habitats in the surrounding  
394 landscape. The more wooded landscapes can probably support larger and more connected populations  
395 of bank voles resulting in a lower local extinction probability in a given habitat patch (Paillat and  
396 Butet 1996). Consequently, it is expected a lower local extinction probability of their parasites  
397 (including tick species specialized on small mammals, like *I. trianguliceps* and *I. acuminatus*), and  
398 subsequently/or of the infectious agents they could transmit, like *A. phagocytophilum* (**H1**).

399 The relationship between the proportion of ecotones and prevalence was negative in single explanatory  
400 variable models but positive in multiple explanatory variables models. Actually, a low proportion of  
401 ecotones can either correspond to fragmented landscapes with few wooded habitats patches and to  
402 landscapes with a high proportion of wooded habitats where edges are scarce. This variable may thus  
403 not be sufficient *per se* to compare highly contrasted landscapes.

404

#### 405 *Prevalence of Borrelia burgdorferi sensu lato*

406 The *B. burgdorferi* s.l. prevalence in small mammals, particularly bank voles, was positively related to  
407 the proportion of ecotones within 100 m. These results suggest an enhanced transmission of these  
408 bacteria at the interface between wooded and open (i.e. crops and grassland) habitats and therefore in  
409 fragmented landscapes where such ecotones are frequent. A possible explanation of increased  
410 *B. burgdorferi* s.l. prevalence in such landscapes is an increased density of *I. ricinus* nymphs resulting

411 of an increased small mammal host density amplifying the transmission cycle (Hoch et al. 2010;  
412 Agoulon et al. 2012; Cayol et al. 2018). However, in a previous study, no relationship between the  
413 abundance of *I. ricinus* nymphs and *B. burgdorferi* s.l. prevalence was observed (Perez et al. 2017).  
414 The absence of spatial pattern in *B. burgdorferi* s.l. prevalence in wood mice could be explained the  
415 mobility of this species and its ability to use crops and grassland. Several studies showed that wood  
416 mice, which are more prone to host *Ixodes* sp. larvae than bank voles, despite displaying lower  
417 bacterial load, may yield more nymphs infected by those bacteria than the latter species (Humair et al.  
418 1993, 1999). It is thus possible that wood mice act as medium distance dispersers (at least up  
419 to 500 m) of infected *Ixodes* sp. larvae that become infective nymphs, as previously suggested in other  
420 studies (Boyard et al. 2008; Gassner et al. 2008). These results support a role of the specificity of  
421 infectious agents in their distribution patterns (**H3**).

422 For both infectious agents, the measures of wooded habitats connectivity did not improve the models  
423 compared to simple composition and configuration variables. In our study area, variation in the  
424 connectivity of these habitats was maybe not contrasted enough to be capture (Michel et al. 2007).  
425 Alternatively, the connectivity measures may not be at the appropriate scale for small mammal  
426 species, which are highly influenced by habitats quality and heterogeneity within each land cover  
427 (Michel et al. 2007), which should be accounted for in higher resolution models and/or habitat quality  
428 based landscape connectivity models (Mortelliti et al. 2010). It would also be interesting to account for  
429 other potential factors affecting small mammal communities and the prevalence of their tick-borne  
430 infectious agents, like predation pressure (Hofmeester et al. 2017).

431 Finally, species which were rare in the sampled habitats (i.e. Crowned shrew, Field vole and Common  
432 pine vole) can also host *A. phagocytophilum* and/or *B. burgdorferi* s.l. (Bown et al. 2008, 2009, 2011).  
433 Further studies including habitats where these species can be more abundant (e.g. fallow lands, fields'  
434 margins, clear cuts) and focusing on more hosts species, especially for *B. burgdorferi* s.l., would allow  
435 a better overall view of the studied infectious agents distribution and their spread in the landscape.

436

### 437 *Conclusion*

438 The increase in *A. phagocytophilum* prevalence can be substantially explained by an increasing  
439 proportion of wooded habitats in the surrounding landscape, at least up to 500 m, validating the host  
440 population size hypothesis (**H1**). Despite a weak positive relationship between bank vole abundance  
441 and *A. phagocytophilum* prevalence, no indirect effect of the landscape structure on this prevalence  
442 has been detected, questioning the overall small mammal community competence hypothesis (**H2**).  
443 Indeed, only the abundance of wood mice was significantly linked to our landscape variables, but at  
444 larger scales than the landscape variables related to the prevalence of the studied tick-borne infectious  
445 agents. The *B. burgdorferi* s.l. prevalence could not be explained by any landscape variables, excepted

446 by the presence of ecotones at small scale (< 100 m). Thus, the prevalence of the two studied tick-  
447 borne infectious agents displayed contrasted spatial patterns, a difference which likely results of the  
448 wider ranges of hosts and vectors of *B. burgdorferi* s.l., as predicted by the infectious agent specificity  
449 hypothesis (**H3**). As a whole, our results demonstrate the interest of integrating complementary  
450 approaches such as landscape ecology and community ecology to the study of tick-borne diseases  
451 ecology to better understand their spatial distribution in the landscape in a risk prevention objective.

452

### 453 **Competing interests**

454 The authors declare no competing interests

455

### 456 **Authors' contributions**

457 GP, SB, AA, GV, OP and AB designed the study. GP, SB, AA, YR, OP and AB participated to the  
458 small mammal field sampling. AC performed most of the DNA extractions and the molecular  
459 analyses. YR managed the GIS data. GP performed all data analyses and drafted the manuscript. All  
460 authors read, commented and approved the manuscript.

461

### 462 **Acknowledgement**

463 We are very grateful to Agnès Bouju, Floriane Boullot, Axelle Durand, Mathieu Gonnet, Olivier  
464 Jambon, Maggy Jouglin, Emmanuelle Moreau, Pranav Pandit, and Ionut Pavel who helped in  
465 sampling and preparation of small mammal tissues before molecular analyses; to Séverine Barry,  
466 Amélie Cohadon, Angélique Pion, and Valérie Poux who helped in the lab for the molecular detection  
467 of infectious agents; and to Nelly Dorr and Isabelle Lebert who managed the data base of the OSCAR  
468 project (<https://www6.inra.fr/oscar/>). We thank the 'Zone Atelier Armorique' ([https://osur.univ-  
469 rennes1.fr/za-armorique/](https://osur.univ-rennes1.fr/za-armorique/)) for providing the GIS data and for the access to its field facilities. We thank  
470 Henri Lemerrier and Benoît Chevallier from the 'Office National des Forêts' for having facilitated the  
471 access to the Villecartier forest. The 'Tiques et Maladies à Tiques' team of the 'Réseau Ecologie des  
472 Interactions Durables' group, supported by the INRA and the CNRS gave a rich thinking environment.  
473 This work was funded by the French National Research Agency (ANR-11-Agro-001-04; call for  
474 Proposal 'Agrobiosphere', OSCAR project). This work is part of the PhD of GP, which was supported  
475 by a fellowship from the Brittany region, France. The funders had no role in study design, data  
476 collection and interpretation, or the decision to submit the work for publication.

477

478

479 **References**

- 480 Agoulon A, Malandrin L, Lepigeon F, et al (2012) A vegetation index qualifying pasture edges is  
481 related to *Ixodes ricinus* density and to *Babesia divergens* seroprevalence in dairy cattle herds.  
482 Vet Parasitol 185:101–109.
- 483 Allan BF, Keesing F, Ostfeld RS (2003) Effect of forest fragmentation on Lyme disease risk. Conserv  
484 Biol 17:267–272.
- 485 Begon M, Hazel SM, Telfer S, et al (2003) Rodents, cowpox virus and islands: densities, numbers and  
486 thresholds. J Anim Ecol 72:343–355.
- 487 Blaňarová L, Stanko M, Carpi G, et al (2014) Distinct *Anaplasma phagocytophilum* genotypes  
488 associated with *Ixodes trianguliceps* ticks and rodents in Central Europe. Ticks Tick Borne Dis  
489 5:928–938.
- 490 Boussard H, Baudry J (2014) Chloe2012: a software for landscape pattern analysis  
491 (<http://www.rennes.inra.fr/sad/Outils-Produits/Outils-informatiques/Chloe>). 41 p.
- 492 Bown KJ, Begon M, Bennett M, et al (2003) Seasonal dynamics of *Anaplasma phagocytophila* in a  
493 rodent-tick (*Ixodes trianguliceps*) system, United Kingdom. Emerg Infect Dis 9:63–70.
- 494 Bown KJ, Lambin X, Ogden NH, et al (2009) Delineating *Anaplasma phagocytophilum* ecotypes in  
495 coexisting, discrete enzootic cycles. Emerg Infect Dis 15:1948–1954.
- 496 Bown KJ, Lambin X, Telford G, et al (2011) The common shrew (*Sorex araneus*): a neglected host of  
497 tick-borne infections? Vector-borne Zoonotic Dis 11:947–953.
- 498 Bown KJ, Lambin X, Telford GR, et al (2008) Relative importance of *Ixodes ricinus* and *Ixodes*  
499 *trianguliceps* as vectors for *Anaplasma phagocytophilum* and *Babesia microti* in field vole  
500 (*Microtus agrestis*) populations. Appl Environ Microbiol 74:7118–7125.
- 501 Boyard C, Vourc’h G, Barnouin J (2008) The relationships between *Ixodes ricinus* and small mammal  
502 species at the woodland-pasture interface. Exp Appl Acarol 44:61–76.
- 503 Cayol C, Jääskeläinen A, Koskela E, et al (2018) Sympatric *Ixodes*-tick species: pattern of distribution  
504 and pathogen transmission within wild rodent populations. Sci Rep 8:16660.
- 505 Chastagner A, Moinet M, Perez G, et al (2016) Prevalence of *Anaplasma phagocytophilum* in small  
506 rodents in France. Ticks Tick Borne Dis 7:988–991.
- 507 Clay CA, Lehmer EM, Jeor SS, Dearing MD (2009) Testing mechanisms of the dilution effect: Deer  
508 mice encounter rates, sin nombre virus prevalence and species diversity. Ecohealth 6:250–259.
- 509 Close B, Banister K, Baumans V, et al (1997) Recommendations for euthanasia of experimental  
510 animals: Part 2. Lab Anim 31:1–32.
- 511 Coipan EC, Sprong H (2016) Ecology of *Borrelia burgdorferi* sensu lato. In: Braks MAH, van Wieren

- 512 SE, Takken W, Sprong H (eds) Ecology and prevention of Lyme borreliosis. Wageningen  
513 Academic Publishers, Wageningen, pp 41–61
- 514 Courtney JW, Kostelnik LM, Zeidner NS, Massung RF (2004) Multiplex real-time PCR for detection  
515 of *Anaplasma phagocytophilum* and *Borrelia burgdorferi*. J Clin Microbiol 42:3164–3168.
- 516 Eskildsen A (2010) Effects of resource abundance on habitat selection and spatial behavior of the bank  
517 vole (*Myodes glareolus*). University of Copenhagen
- 518 Ferrante M, González E, Lövei GL (2017) Predators do not spill over from forest fragments to maize  
519 fields in a landscape mosaic in central Argentina. Ecol Evol 7:1–9.
- 520 Foltête JC, Clauzel C, Vuidel G (2012) A software tool dedicated to the modelling of landscape  
521 networks. Environ Model Softw 38:316–327.
- 522 Gassner F, Verbaarschot P, Smallegange RC, et al (2008) Variations in *Ixodes ricinus* density and  
523 *Borrelia* infections associated with cattle introduced into a woodland in The Netherlands. Appl  
524 Environ Microbiol 74:7138–44.
- 525 Gehring TM, Swihart RK (2003) Body size, niche breadth, and ecologically scaled responses to  
526 habitat fragmentation: mammalian predators in an agricultural landscape. Biol Conserv 109:283–  
527 295.
- 528 Gern L, Estrada-Peña A, Frandsen F, et al (1998) European reservoir hosts of *Borrelia burgdorferi*  
529 sensu lato. Zentralbl Bakteriologie 287:196–204.
- 530 Gern L, Siegenthaler M, Hu CM, et al (1994) *Borrelia burgdorferi* in rodents (*Apodemus flavicollis*  
531 and *A. sylvaticus*): Duration and enhancement of infectivity for *Ixodes ricinus* ticks. Eur J  
532 Epidemiol 10:75–80.
- 533 Gil-Tena A, Nabucet J, Mony C, et al (2014) Woodland bird response to landscape connectivity in an  
534 agriculture-dominated landscape: a functional community approach. Community Ecol 15:256–  
535 268.
- 536 Gottdenker NL, Chaves LF, Calzada JE, et al (2012) Host life history strategy, species diversity, and  
537 habitat influence *Trypanosoma cruzi* vector infection in changing landscapes. PLoS Negl Trop  
538 Dis 6:e1884, 11p.
- 539 Guivier E, Galan M, Chaval Y, et al (2011) Landscape genetics highlights the role of bank vole  
540 metapopulation dynamics in the epidemiology of Puumala hantavirus. Mol Ecol 20:3569–3583.
- 541 Halos L, Bord S, Cotté V, et al (2010) Ecological factors characterizing the prevalence of bacterial  
542 tick-borne pathogens in *Ixodes ricinus* ticks in pastures and woodlands. Appl Environ Microbiol  
543 76:4413–4420.
- 544 Hersh MH, Tibbetts M, Strauss M, et al (2012) Reservoir competence of wildlife host species for



- 545 *Babesia microti*. Emerg Infect Dis 18:1951–1957.
- 546 Heylen D, Tjisse E, Fonville M, et al (2013) Transmission dynamics of *Borrelia burgdorferi* s.l. in a  
547 bird tick community. Environ Microbiol 15:663–673.
- 548 Hoch T, Monnet Y, Agoulon A (2010) Influence of host migration between woodland and pasture on  
549 the population dynamics of the tick *Ixodes ricinus*: a modelling approach. Ecol Modell  
550 221:1798–1806.
- 551 Hofmeester TR, Coipan EC, van Wieren SE, et al (2016) Few vertebrate species dominate the *Borrelia*  
552 *burgdorferi* s.l. life cycle. Environ Res Lett 11:043001, 16p.
- 553 Hofmeester TR, Jansen PA, Wijnen HJ, et al (2017) Cascading effects of predator activity on tick-  
554 borne disease risk. 0–7.
- 555 Huang ZYX, de Boer WF, van Langevelde F, et al (2013) Species' life-history traits explain  
556 interspecific variation in reservoir competence: a possible mechanism underlying the dilution  
557 effect. PLoS One 8:e54341, 6p.
- 558 Hubbard MJ, Baker AS, Cann KJ (1998) Distribution of *Borrelia burgdorferi* s.l. spirochaete DNA in  
559 British ticks (Argasidae and Ixodidae) since the 19th century, assessed by PCR. Med Vet  
560 Entomol 12:89–97.
- 561 Humair PF, Rais O, Gern L (1999) Transmission of *Borrelia afzelii* from *Apodemus* mice and  
562 *Clethrionomys voles* to *Ixodes ricinus* ticks: differential transmission pattern and overwintering  
563 maintenance. Parasitology 118:33–42.
- 564 Humair PF, Turrian N, Aeschlimann A, Gern L (1993) *Borrelia burgdorferi* in a focus of Lyme  
565 borreliosis: epizootiologic contribution of small mammals. Folia Parasitol (Praha) 40:65–70.
- 566 Hurvich CM, Tsai C-L (1989) Regression and time series model selection in small samples.  
567 Biometrika 76:297–307.
- 568 Jahfari S, Coipan EC, Fonville M, et al (2014) Circulation of four *Anaplasma phagocytophilum*  
569 ecotypes in Europe. Parasit Vectors 7:365, 11p.
- 570 Johnson PTJ, Preston DL, Hoverman JT, Richgels KLD (2013) Biodiversity decreases disease through  
571 predictable changes in host community competence. Nature 494:230–233.
- 572 Jones KE, Patel NG, Levy MA, et al (2008) Global trends in emerging infectious diseases. Nature  
573 451:990–993.
- 574 Jongejan F, Uilenberg G (2005) The global importance of ticks. Parasitology 129:S3–S14.
- 575 Kallio ER, Begon M, Birtles RJ, et al (2014) First Report of *Anaplasma phagocytophilum* and *Babesia*  
576 *microti* in Rodents in Finland. Vector-borne Zoonotic Dis 14:389–393.
- 577 Keesing F, Brunner J, Duerr S, et al (2009) Hosts as ecological traps for the vector of Lyme disease.

- 578 Proc R Soc B Biol Sci 276:3911–3919.
- 579 Kikkawa T (1964) Movement, activity and distribution of the small rodents *Clethrionomys glareolus*  
580 and *Apodemus sylvaticus* in Woodland. J Anim Ecol 33:259–299.
- 581 Kurtenbach K, De Michelis S, Etti S, et al (2002a) Host association of *Borrelia burgdorferi* sensu  
582 lato—the key role of host complement. Trends Microbiol 10:74–79.
- 583 Kurtenbach K, De Michelis S, Sewell HS, et al (2002b) The key roles of selection and migration in the  
584 ecology of Lyme borreliosis. Int J Med Microbiol 291:152–154.
- 585 Kurtenbach K, Hanincová K, Tsao JI, et al (2006) Fundamental processes in the evolutionary ecology  
586 of Lyme borreliosis. Nat Rev Microbiol 4:660–669.
- 587 Lambin EF, Tran A, Vanwambeke SO, et al (2010) Pathogenic landscapes: interactions between land,  
588 people, disease vectors, and their animal hosts. Int J Health Geogr 9:54.
- 589 Mader H (1984) Animal habitat isolation by roads and agricultural fields. Biol Conserv 29:81–96.
- 590 Mansfield KL, Johnson N, Phipps LP, et al (2009) Tick-borne Encephalitis Virus - A Review of an  
591 Emerging Zoonosis. J Gen Virol 90:1781–94.
- 592 Margos G, Vollmer SA, Cornet M, et al (2009) A new *Borrelia* species defined by multilocus  
593 sequence analysis of housekeeping genes. Appl Environ Microbiol 75:5410–5416.
- 594 Marsot M, Chapuis JL, Gasqui P, et al (2013) Introduced Siberian Chipmunks (*Tamias sibiricus*  
595 *barberi*) Contribute More to Lyme Borreliosis Risk than Native Reservoir Rodents. PLoS One  
596 8:1–8.
- 597 Meunier FD, Corbin J, Verheyden C, Jouventin P (1999) Effects of landscape type and extensive  
598 management on use of motorway roadsides by small mammals. Can J Zool 77:108–117.
- 599 Michel N, Burel F, Butet A (2006) How does landscape use influence small mammal diversity,  
600 abundance and biomass in hedgerow networks of farming landscapes? Acta Oecologica 30:11–  
601 20.
- 602 Michel N, Burel F, Legendre P, Butet A (2007) Role of habitat and landscape in structuring small  
603 mammal assemblages in hedgerow networks of contrasted farming landscapes in Brittany,  
604 France. Landsc Ecol 22:1241–1253.
- 605 Mortelliti A, Amori G, Boitani L (2010) The role of habitat quality in fragmented landscapes: a  
606 conceptual overview and prospectus for future research. Oecologia 163:535–547.
- 607 Nupp TE, Swihart RK (1998) Effects of forest fragmentation on populations attributes of White-footed  
608 mice and Eastern chipmunks. J Mammal 79:1234–1243.
- 609 Nupp TE, Swihart RK (2000) Landscape-level correlates of small-mammal assemblages in forest  
610 fragments of farmland. J Mammal 81:512–526.

- 611 Ostfeld RS, Keesing F (2000) Biodiversity and disease risk: the case of Lyme disease. *Conserv Biol*  
612 14:722–728.
- 613 Ostfeld RS, Levi T, Jolles AE, et al (2014) Life history and demographic drivers of reservoir  
614 competence for three tick-borne zoonotic pathogens. *PLoS One* 9:e107387, 8p.
- 615 Ostfeld RS, LoGiudice K (2003) Community disassembly, biodiversity loss, and the erosion of an  
616 ecosystem service. *Ecology* 84:1421–1427.
- 617 Ouin A, Paillat G, Butet A, Burel F (2000) Spatial dynamics of wood mouse (*Apodemus sylvaticus*) in  
618 an agricultural landscape under intensive use in the Mont Saint Michel Bay (France). *Agric*  
619 *Ecosyst Environ* 78:159–165.
- 620 Paillat G, Butet A (1996) Spatial dynamics of the bank vole (*Clethrionomys glareolus*) in a  
621 fragmented landscape. *Acta Oecologica* 17:553–559.
- 622 Papillon Y, Buffiere L, Butet A (2002) Rhodamine B as collective marker for small mammals. *Acta*  
623 *Theriol (Warsz)* 47:491–497.
- 624 Perez G, Bastian S, Agoulon A, et al (2016) Effect of landscape features on the relationship between  
625 *Ixodes ricinus* ticks and their small mammal hosts. *Parasit Vectors* 9:1–18.
- 626 Perez G, Bastian S, Chastagner A, et al (2017) Ecological factors influencing small mammal infection  
627 by *Anaplasma phagocytophilum* and *Borrelia burgdorferi* s.l. in agricultural and forest  
628 landscapes. *Environ Microbiol* 19:4205–4219.
- 629 Pisanu B, Chapuis JL, Dozières A, et al (2014) High prevalence of *Borrelia burgdorferi* s.l. in the  
630 European red squirrel *Sciurus vulgaris* in France. *Ticks Tick Borne Dis* 5:1–6.
- 631 R Development Core Team (2014) R. The R Foundation for Statistical Computing.
- 632 Randolph SE (1975a) Seasonal dynamics of a host-parasite system: *Ixodes trianguliceps* (Acarina:  
633 Ixodidae) and its small mammal hosts. *J Anim Ecol* 44:425–449.
- 634 Randolph SE (1975b) Patterns of Distribution of the Tick *Ixodes trianguliceps* Birula on Its Hosts. *J*  
635 *Anim Ecol* 44:451–474.
- 636 Rico A, Kindlmann P, Sedláček F (2007) Barrier effects of roads on movements of small mammals.  
637 *Folia Zool* 56:1–12.
- 638 Rizzoli A, Hauffe HC, Carpi G, et al (2011) Lyme borreliosis in Europe. *Eurosurveillance* 16:1–8.
- 639 Roche B, Rohani P, Dobson AP, Guégan J-F (2013) The impact of community organization on vector-  
640 borne pathogens. *Am Nat* 181:1–11.
- 641 Rollend L, Fish D, Childs JE (2013) Transovarial transmission of *Borrelia* spirochetes by *Ixodes*  
642 *scapularis*: A summary of the literature and recent observations. *Ticks Tick Borne Dis* 4:46–51.

- 643 Rosso F, Tagliapietra V, Baráková I, et al (2017) Prevalence and genetic variability of *Anaplasma*  
644 *phagocytophilum* in wild rodents from the Italian Alps. Parasit Vectors 10:293.
- 645 Rubio A, Ávila-Flores R, Suzán G (2014) Responses of small mammals to habitat fragmentation:  
646 epidemiological considerations for rodent-borne hantaviruses in the Americas. Ecohealth 526–  
647 533.
- 648 Ruiz-Capillas P, Mata C, Malo JE (2015) How many rodents die on the road? Biological and  
649 methodological implications from a small mammals' roadkill assessment on a Spanish  
650 motorway. Ecol Res 30:417–427.
- 651 Saura S, Pascual-Hortal L (2007) A new habitat availability index to integrate connectivity in  
652 landscape conservation planning: Comparison with existing indices and application to a case  
653 study. Landsc Urban Plan 83:91–103.
- 654 Sinski E, Pawelczyk A, Bajer A, Behnke JM (2006) Abundance of wild rodents, ticks and  
655 environmental risk of Lyme borreliosis: A longitudinal study in an area of Mazury Lakes district  
656 of Poland. Ann Agric Environ Med 13:295–300.
- 657 Skuballa J, Petney T, Pfäffle M, et al (2012) Occurrence of different *Borrelia burgdorferi* sensu lato  
658 genospecies including *B. afzelii*, *B. bavariensis*, and *B. spielmanii* in hedgehogs (*Erinaceus* spp.)  
659 in Europe. Ticks Tick Borne Dis 3:8–13.
- 660 Stuen S, Granquist EG, Silaghi C (2013) *Anaplasma phagocytophilum*—a widespread multi-host  
661 pathogen with highly adaptive strategies. Front Cell Infect Microbiol 3:1–33.
- 662 Suzán G, García-Peña GE, Castro-Arellano I, et al (2015) Metacommunity and phylogenetic structure  
663 determine wildlife and zoonotic infectious disease patterns in time and space. Ecol Evol 5:865–  
664 873.
- 665 Szacki J (1987) Ecological Corridor as a Factor Determining the Structure and Organization of a Bank  
666 Vole Population. Acta Theriol (Warsz) 32:31–44.
- 667 Szacki J, Babińska-werka J, Liro A (1993) The influence of landscape spatial structure on small  
668 mammal movements. Acta Theriol (Warsz) 38:113–123.
- 669 Szekeres S, Coipan EC, Rigó K, et al (2015) Eco-epidemiology of *Borrelia miyamotoi* and Lyme  
670 borreliosis spirochetes in a popular hunting and recreational forest area in Hungary. Parasit  
671 Vectors 8:1–8.
- 672 Tattersall FH, Macdonald DW, Hart BJ, et al (2002) Is habitat linearity important for small mammal  
673 communities on farmland? J Appl Ecol 39:643–652.
- 674 Tew TE, Macdonald DW (1994) Dynamics of space use and male vigour amongst wood mice,  
675 *Apodemus sylvaticus*, in the cereal ecosystem. Behav Ecol Sociobiol 34:337–345.

- 676 van Apeldoorn RC, Oostenbrink WT, van Winden A, van der Zee FF (2012) Effects of fragmentation  
677 on the bank vole, *Clethrionomys glareolus*, in an agricultural landscape. *Oikos* 65:265–274.
- 678 Vourc'h G, Boyard C, Barnouin J (2008) Mammal and bird species distribution at the woodland-  
679 pasture interface in relation to the circulation of ticks and pathogens. *Ann N Y Acad Sci*  
680 1149:322–325.
- 681 Zhang Z, Usher MB (1991) Dispersal of wood mice and bank voles in an agricultural landscape. *Acta*  
682 *Theriol (Warsz)* 36:239–245.
- 683
- 684

685 **Tables and figures captions**

686

**Table 1: Resistance coefficients attributed to each land cover class for the Wood mouse and the Bank vole.**

| Land cover                                                              | Wood mouse<br>friction coefficients | Bank vole<br>friction coefficients |
|-------------------------------------------------------------------------|-------------------------------------|------------------------------------|
| Forest, woodlots, copses, hedgerows and fallow lands                    | 1                                   | 1                                  |
| Grassland (meadows and grassy strips)                                   | 4                                   | 15                                 |
| Crops                                                                   | 5                                   | 15                                 |
| Unasphalted roads                                                       | 15                                  | 15                                 |
| Small roads                                                             | 30                                  | 30                                 |
| Medium roads                                                            | 45                                  | 45                                 |
| Major roads                                                             | 60                                  | 60                                 |
| Expressways                                                             | 75                                  | 75                                 |
| Buildings, dependencies, water bodies and streams<br>(ponds and rivers) | 100                                 | 100                                |

687

688

**Table 2: Landscape variables used in the study**

| Variable                                       | Scale (m) <sup>a</sup> | Unit                   | Mean  | Range (min; max) |
|------------------------------------------------|------------------------|------------------------|-------|------------------|
| Ratio of wooded habitats                       |                        |                        |       |                  |
| Wooded.50m                                     | 50                     | Ratio of pixels        | 0.511 | 0.053; 0.986     |
| Wooded.100m                                    | 100                    | Ratio of pixels        | 0.487 | 0.039; 0.988     |
| Wooded.200m                                    | 200                    | Ratio of pixels        | 0.453 | 0.042; 0.990     |
| Wooded.500m                                    | 500                    | Ratio of pixels        | 0.420 | 0.034; 0.970     |
| Ratio of ecotones                              |                        |                        |       |                  |
| Ecotones.50m                                   | 50                     | Ratio of pixel couples | 0.048 | 0.021; 0.090     |
| Ecotones.100m                                  | 100                    | Ratio of pixel couples | 0.042 | 0.017; 0.075     |
| Ecotones.200m                                  | 200                    | Ratio of pixel couples | 0.034 | 0.014; 0.057     |
| Ecotones.500m                                  | 500                    | Ratio of pixel couples | 0.027 | 0.012; 0.047     |
| Connectivity measures                          |                        |                        |       |                  |
| log(dPC.graph.Euclidian.25m)                   | 25                     | none                   | 6.17  | -2.00; 12.73     |
| log(dPC.graph.Euclidian.50m)                   | 50                     | none                   | 6.26  | -2.08; 12.73     |
| log(dPC.graph.Euclidian.100m)                  | 100                    | none                   | 6.35  | -2.12; 12.71     |
| log(dPC.graph.Euclidian.250m)                  | 250                    | none                   | 6.62  | -1.82; 12.72     |
| log(dPC.graph.least.cost.As.100m) <sup>b</sup> | 100                    | none                   | 6.52  | -2.01; 12.79     |
| log(dPC.graph.least.cost.Mg.25m) <sup>c</sup>  | 25                     | none                   | 5.99  | -3.20; 12.76     |
| log(Area)                                      | Patch                  | m <sup>2</sup>         | 11.15 | 6.48; 14.57      |

<sup>a</sup> Buffer zone radius (ratios) or median movement distance (connectivity).

<sup>b</sup> As: with the friction coefficients set for *Apodemus sylvaticus*.

<sup>c</sup> Mg: with the friction coefficients set for *Myodes glareolus*.

689

690

**Table 3: Results of of *Anaplasma phagocytophilum* and *Borrelia burgdorferi* s.l. PCR detection per sampling site over the two-year sampling (2012-2013).**

| Site                  | Landscape context <sup>a</sup> | Tested and positive individuals for <i>A. phagocytophilum</i> ( <i>Aph</i> ) and <i>B. burgdorferi</i> s.l. ( <i>Bb sl</i> ) <sup>b</sup> |             |              |                  |             |              |                  |            |              |                  |            |              |                  |             |              |                  |            |              |             |
|-----------------------|--------------------------------|-------------------------------------------------------------------------------------------------------------------------------------------|-------------|--------------|------------------|-------------|--------------|------------------|------------|--------------|------------------|------------|--------------|------------------|-------------|--------------|------------------|------------|--------------|-------------|
|                       |                                | Asyl                                                                                                                                      |             |              | Mgla             |             |              | Magr             |            |              | Msub             |            |              | Scor             |             |              | Total            |            |              |             |
|                       |                                | Nbr <sup>c</sup>                                                                                                                          | <i>Aph</i>  | <i>Bb sl</i> | Nbr <sup>c</sup> | <i>Aph</i>  | <i>Bb sl</i> | Nbr <sup>c</sup> | <i>Aph</i> | <i>Bb sl</i> | Nbr <sup>c</sup> | <i>Aph</i> | <i>Bb sl</i> | Nbr <sup>c</sup> | <i>Aph</i>  | <i>Bb sl</i> | Nbr <sup>c</sup> | <i>Aph</i> | <i>Bb sl</i> |             |
| 1                     | FC                             | 11                                                                                                                                        | 1           | 0            | 2                | 0           | 0            |                  |            |              |                  |            |              |                  |             |              |                  | 13         | 1            | 0           |
| 2                     | FC                             | 9                                                                                                                                         | 0           | 0            | 10               | 1           | 0            |                  |            |              |                  |            |              |                  |             |              |                  | 19         | 1            | 0           |
| 3                     | FC                             | 9                                                                                                                                         | 0           | 0            | 2                | 1           | 0            |                  |            |              |                  |            |              |                  |             |              |                  | 11         | 1            | 0           |
| 4                     | FC                             | 19                                                                                                                                        | 2           | 1            | 11               | 9           | 0            | 2                | 0          | 0            |                  |            |              | 1                | 1           | 0            |                  | 33         | 12           | 1           |
| 5                     | FC                             | 19                                                                                                                                        | 2           | 1            | 10               | 2           | 1            | 1                | 0          | 0            |                  |            |              |                  |             |              |                  | 30         | 4            | 2           |
| 6                     | FC                             | 19 <sup>d</sup>                                                                                                                           | 1           | 1            | 1                | 0           | 0            |                  |            |              |                  |            |              |                  |             |              |                  | 20         | 1            | 1           |
| 7                     | FE                             | 18                                                                                                                                        | 2           | 0            | 13               | 1           | 0            | 1                | 0          | 0            |                  |            |              |                  |             |              |                  | 32         | 3            | 0           |
| 8                     | FE                             | 32                                                                                                                                        | 2           | 2            | 3                | 1           | 0            |                  |            |              |                  |            |              |                  |             |              |                  | 35         | 3            | 2           |
| 9                     | FE                             | 20                                                                                                                                        | 0           | 0            | 11               | 1           | 1            |                  |            |              |                  |            |              |                  |             |              |                  | 31         | 1            | 1           |
| 10                    | FE                             | 18                                                                                                                                        | 1           | 1            | 1                | 0           | 0            |                  |            |              | 1                | 0          | 0            |                  |             |              |                  | 20         | 1            | 1           |
| 11                    | FE                             | 2                                                                                                                                         | 0           | 0            | 1 <sup>d</sup>   |             |              |                  |            |              |                  |            |              |                  |             |              |                  | 3          | 0            | 0           |
| 12                    | FE                             | 8 <sup>d</sup>                                                                                                                            | 0           | 0            | 2                | 0           | 0            |                  |            |              |                  |            |              |                  |             |              |                  | 10         | 0            | 0           |
| 13                    | ME                             | 21                                                                                                                                        | 2           | 0            | 6 <sup>d</sup>   | 0           | 0            |                  |            |              |                  |            |              |                  |             |              |                  | 27         | 2            | 0           |
| 14                    | ME                             | 32                                                                                                                                        | 3           | 2            | 12               | 4           | 1            |                  |            |              |                  |            |              |                  |             |              |                  | 44         | 7            | 3           |
| 15                    | ME                             | 24                                                                                                                                        | 0           | 0            | 7                | 0           | 1            |                  |            |              |                  |            |              |                  |             |              |                  | 31         | 0            | 1           |
| 16                    | MH                             | 29                                                                                                                                        | 2           | 1            | 13               | 0           | 2            |                  |            |              |                  |            |              |                  |             |              |                  | 42         | 2            | 3           |
| 17                    | MH                             | 21                                                                                                                                        | 0           | 0            | 6                | 0           | 1            |                  |            |              |                  |            |              |                  |             |              |                  | 27         | 0            | 1           |
| 18                    | MH                             | 40 <sup>e</sup>                                                                                                                           | 0           | 1            | 4                | 0           | 0            |                  |            |              | 1                | 0          | 1            |                  |             |              |                  | 45         | 0            | 2           |
| 19                    | OE                             | 32                                                                                                                                        | 0           | 1            | 4                | 0           | 0            |                  |            |              |                  |            |              |                  |             |              |                  | 36         | 0            | 1           |
| 20                    | OE                             | 9                                                                                                                                         | 0           | 0            | 5                | 0           | 0            |                  |            |              |                  |            |              |                  |             |              |                  | 14         | 0            | 0           |
| 21                    | OE                             | 17                                                                                                                                        | 0           | 2            | 4                | 0           | 1            |                  |            |              |                  |            |              |                  |             |              |                  | 21         | 0            | 3           |
| 22                    | OH                             | 16                                                                                                                                        | 0           | 1            | 6                | 0           | 0            |                  |            |              |                  |            |              | 1                | 0           | 0            |                  | 23         | 0            | 1           |
| 23                    | OH                             | 23                                                                                                                                        | 0           | 1            | 8                | 0           | 2            |                  |            |              |                  |            |              |                  |             |              |                  | 31         | 0            | 3           |
| 24                    | OH                             | 6                                                                                                                                         | 2           | 0            | 7                | 0           | 0            |                  |            |              |                  |            |              | 1                | 1           | 0            |                  | 14         | 3            | 0           |
| <b>Total</b>          | <b>24</b>                      | <b>454</b>                                                                                                                                | <b>20</b>   | <b>15</b>    | <b>149</b>       | <b>20</b>   | <b>10</b>    | <b>4</b>         | <b>0</b>   | <b>0</b>     | <b>2</b>         | <b>0</b>   | <b>1</b>     | <b>3</b>         | <b>2</b>    | <b>0</b>     |                  | <b>612</b> | <b>42</b>    | <b>26</b>   |
| <b>% of total</b>     |                                | <b>74.2</b>                                                                                                                               | <b>3.3</b>  | <b>2.5</b>   | <b>24.3</b>      | <b>3.3</b>  | <b>1.6</b>   | <b>0.65</b>      | <b>0</b>   | <b>0</b>     | <b>0.33</b>      | <b>0</b>   | <b>0.16</b>  | <b>0.49</b>      | <b>0.3</b>  | <b>0</b>     |                  | <b>100</b> | <b>6.91</b>  | <b>4.29</b> |
| <b>Prevalence (%)</b> |                                |                                                                                                                                           | <b>4.42</b> | <b>3.33</b>  |                  | <b>13.6</b> | <b>6.80</b>  |                  | <b>0</b>   | <b>0</b>     |                  | <b>0</b>   | <b>50</b>    |                  | <b>66.7</b> | <b>0</b>     |                  |            | <b>6.91</b>  | <b>4.29</b> |

<sup>a</sup> FC: forest core; FE: forest edge; ME: mixed farming at woodlot edge; MH: mixed farming along hedgerows; OE: open farming at woodlot edge; and OH: open farming along hedgerows.

<sup>b</sup> Asyl: *Apodemus sylvaticus*; Mgla: *Myodes glareolus*; Magr: *Microtus agrestis*; Msub: *M. subterraneus*; and Scor: *Sorex coronatus*.

<sup>c</sup> Total number of individuals over the two-year sampling.

<sup>d</sup> Including one individual not tested.

<sup>e</sup> Including two individuals not tested for *B. burgdorferi* s.l. only.

691  
692

693



**Table 4: The most supported binomial GLMs of *Anaplasma phagocytophilum* prevalence as a function of the landscape and species abundances variables according to the AICc-based selection procedure.**

| All small mammals                        |      |                                                    |       |               |                |
|------------------------------------------|------|----------------------------------------------------|-------|---------------|----------------|
| Model set                                | Rank | Variables and their significativity                | AICc  | $\Delta$ AICc | R <sup>2</sup> |
| Null model                               |      |                                                    | 106.8 |               |                |
| Landscape                                | 1    | <b>Wooded.50m***</b>                               | 86.4  |               | 0.331          |
| Community                                | 1    | <b>N.Mg***</b>                                     | 97.5  |               | 0.170          |
|                                          | 2    | N.Mg <sup>o</sup> + Ratio.Mg:As                    | 98.9  | 1.37          | 0.188          |
| Community and landscape                  | 1    | <b>Wooded.50m*** + N.Mg**</b>                      | 79.0  |               | 0.478          |
| Wood mice ( <i>Apodemus sylvaticus</i> ) |      |                                                    |       |               |                |
| Model set                                | Rank | Variables and their significativity                | AICc  | $\Delta$ AICc | R <sup>2</sup> |
| Null model                               |      |                                                    | 61.4  |               |                |
| Landscape                                | 1    | <b>Wooded.50m*</b>                                 | 59.0  |               | 0.144          |
|                                          | 2    | Ecotones.100m <sup>o</sup>                         | 60.3  | 1.89          | 0.105          |
|                                          | 3    | Wooded.100m <sup>o</sup>                           | 60.3  | 1.90          | 0.104          |
|                                          | 4    | log(Area) <sup>o</sup>                             | 60.6  | 2.17          | 0.096          |
|                                          | 5    | Wooded.200m <sup>o</sup>                           | 60.8  | 2.37          | 0.090          |
| Community                                | 1    | <b>Ratio.Mg:As*</b>                                | 59.1  |               | 0.141          |
|                                          | 2    | N.Mg <sup>o</sup>                                  | 60.5  | 1.40          | 0.099          |
| Community and landscape                  | 1    | <b>Wooded.50m* + N.Mg<sup>o</sup></b>              | 58.4  |               | 0.241          |
|                                          | 2    | Wooded.50m <sup>o</sup> + Ratio.Mg:As <sup>o</sup> | 58.5  | 0.06          | 0.239          |
|                                          | 5    | log(Area) + Ratio.Mg:As*                           | 59.5  | 1.07          | 0.227          |
|                                          | 6    | Wooded.100m + Ratio.Mg:As <sup>o</sup>             | 59.6  | 1.20          | 0.205          |
|                                          | 7    | log(Area) <sup>o</sup> + N.Mg <sup>o</sup>         | 59.8  | 1.36          | 0.200          |
|                                          | 8    | Wooded.100m <sup>o</sup> + N.Mg <sup>o</sup>       | 59.8  | 1.37          | 0.200          |
|                                          | 9    | Ecotones.100m <sup>o</sup> + N.Mg <sup>o</sup>     | 59.8  | 1.40          | 0.199          |
|                                          | 10   | Wooded.200m + Ratio.Mg:As <sup>o</sup>             | 60.1  | 1.68          | 0.190          |
|                                          | 13   | Wooded.200m <sup>o</sup> + N.Mg <sup>o</sup>       | 60.3  | 1.92          | 0.183          |
| Bank voles ( <i>Myodes glareolus</i> )   |      |                                                    |       |               |                |
| Model set                                | Rank | Variables and their significativity                | AICc  | $\Delta$ AICc | R <sup>2</sup> |
| Null model                               |      |                                                    | 73.0  |               |                |
| Landscape                                | 1    | <b>Ecotones.200m* + Wooded.50m***</b>              | 52.1  |               | 0.477          |
|                                          | 2    | Ecotones.200m <sup>o</sup> + <b>Wooded.100m***</b> | 52.9  | 0.87          | 0.461          |
|                                          | 3    | <b>Ecotones.200m* + Wooded.200m***</b>             | 52.9  | 0.89          | 0.461          |
|                                          | 4    | <b>Wooded.100m***</b>                              | 54.0  | 1.94          | 0.393          |
| Community                                | 1    | <b>N.Mg*</b>                                       | 71.3  |               | 0.074          |
| Community and landscape                  | 1    | <b>Ecotones.200m*** + Wooded.50m*** + N.Mg*</b>    | 48.9  |               | 0.588          |
|                                          | 2    | <b>Ecotones.100m* + Wooded.50m*** + N.Mg*</b>      | 50.7  | 1.78          | 0.555          |

Only models with  $\Delta$ AICc < 2 are shown. Because the connectivity variables are very strongly correlated to wooded habitat patch size and give similar results, only this latter variable is considered here. Significant codes are: "\*\*\*\*" when  $p \leq 0.001$ ; "\*\*\*" when  $0.001 < p \leq 0.01$ ; "\*\*" when  $0.01 < p \leq 0.05$ ; "\*" when  $0.05 < p \leq 0.1$ ; otherwise,  $0.1 < p$ . Significant variables at  $p < 0.05$  are in bold.

694  
695

696

**Table 5: The most supported binomial GLMs of *Borrelia burgdorferi* s.l. prevalence as a function of the landscape and species abundances variables according to the AICc-based selection procedure.**

| All small mammals                        |      |                                     |      |               |                |
|------------------------------------------|------|-------------------------------------|------|---------------|----------------|
| Model set                                | Rank | Variables and their significativity | AICc | $\Delta$ AICc | R <sup>2</sup> |
| Null model                               |      |                                     | 56.7 |               |                |
| Landscape                                | 1    | <b>Ecotones.50m*</b>                | 55.2 | 0.00          | 0.201          |
|                                          | 2    | Ecotones.100m <sup>o</sup>          | 55.4 | 0.25          | 0.188          |
| Community                                | None |                                     |      |               |                |
| Wood mice ( <i>Apodemus sylvaticus</i> ) |      |                                     |      |               |                |
| Model set                                | Rank | Variables and their significativity | AICc | $\Delta$ AICc | R <sup>2</sup> |
| Null model                               |      |                                     | 43.0 |               |                |
| Landscape                                | None |                                     |      |               |                |
| Community                                | None |                                     |      |               |                |
| Bank voles ( <i>Myodes glareolus</i> )   |      |                                     |      |               |                |
| Model set                                | Rank | Variables and their significativity | AICc | $\Delta$ AICc | R <sup>2</sup> |
| Null model                               |      |                                     | 35.2 |               |                |
| Landscape                                | 1    | <b>Ecotones.100m*</b>               | 33.3 | 0.00          | 0.252          |
|                                          | 2    | <b>Wooded.50m*</b>                  | 33.7 | 0.40          | 0.229          |
|                                          | 3    | Ecotones.50m <sup>o</sup>           | 34.0 | 0.67          | 0.213          |
|                                          | 4    | <b>Wooded.100m*</b>                 | 34.1 | 0.78          | 0.206          |
|                                          | 5    | Ecotones.100m + Wooded.50m          | 34.3 | 1.01          | 0.347          |
|                                          | 6    | log(Area) <sup>o</sup>              | 34.3 | 1.02          | 0.193          |
|                                          | 7    | Wooded.200m <sup>o</sup>            | 34.5 | 1.18          | 0.183          |
|                                          | 8    | Ecotones.100m + Wooded.100m         | 34.5 | 1.22          | 0.311          |
|                                          | 9    | Ecotones.100m + log(Area)           | 34.7 | 1.39          | 0.324          |
|                                          | 10   | Wooded.500m <sup>o</sup>            | 34.7 | 1.44          | 0.168          |
|                                          | 11   | Ecotones.50m + log(Area)            | 34.9 | 1.61          | 0.311          |
|                                          | 12   | Ecotones.50m + Wooded.50m           | 35.0 | 1.66          | 0.309          |
|                                          | 13   | Ecotones.100m + Wooded.200m         | 35.0 | 1.66          | 0.309          |
|                                          | 14   | Ecotones.100m + Wooded.500m         | 35.2 | 1.89          | 0.295          |
| Community                                | None |                                     |      |               |                |

Only models with  $\Delta$ AICc < 2 are shown. Because the connectivity variables are very strongly correlated to wooded habitat patch size and give similar results, only this latter variable was considered here. Significant codes are: "\*\*\*\*" when  $p \leq 0.001$ ; "\*\*\*" when  $0.001 < p \leq 0.01$ ; "\*\*" when  $0.01 < p \leq 0.05$ ; "o" when  $0.05 < p \leq 0.1$ ; otherwise,  $0.1 < p$ . Significant variables at  $p < 0.05$  are in bold.

697  
698

699

700

701 **Figure 1: Example of the habitats landscape connectivity analyses.**

702 Final aggregated 5 m-resolution land cover raster file (**a**) and connectivity indices (dPC, for  
703 ‘difference in Probability of Connectivity’) computed on different graphs (**b**, **c**, and **d**). The sampling  
704 patch on the right (surrounded in blue) appears moderately connected according to Euclidian distances  
705 (**b**), while it is weakly connected when weighted by least cost paths (**c** and **d**) because it is surrounded  
706 by a river at north and roads otherwise (see **a**). The sampling patch on the left is moderately connected  
707 for the Wood mouse (**c**) while it is weakly connected for the Bank vole (**d**) because it is separated to  
708 other wooded habitats patches by large grassland or crops patches resulting in fewer connections in the  
709 graph built for this latter species. See **Materials and Methods** for more details.

710

711 **Figure 2: The *Anaplasma phagocytophilum* prevalence of as a function of the landscape variables**  
712 **and species abundances variables in the most supported binomial Generalized Linear Models.**

713 The *A. phagocytophilum* prevalence, expressed as the frequency of infected individuals per site, in all  
714 small mammals (**a** and **b**), in wood mice (**c** and **d**), and in bank voles (**e**, **f**, and **g**). Fitted binomial  
715 regression curves, according to the multiple explanatory variables GLMs, are shown with 95%  
716 confidence intervals (light grey). Prevalence is shown as a function of the proportion of wooded  
717 habitats in 50 m-radius zones (**a**, **c** and **e**), as a function of the Bank vole abundance (**b**, **d**, and **g**), and  
718 as a function of the proportion of ecotones in 200 m-radius zones (**f**).

719

720 **Figure 3: The of *Borrelia burgdorferi sensu lato* prevalence as a function of the landscape**  
721 **variables in the most supported binomial Generalized Linear Models.**

722 The *B. burgdorferi* s.l. prevalence, expressed as the frequency of infected individuals per site, in all  
723 small mammals (**a**), and in bank voles (**b**). Fitted binomial regression curves, according to single  
724 explanatory variable GLMs, are shown with 95% confidence intervals (light grey). Prevalence is  
725 shown as a function of the proportion of ecotones in 50 m-radius zones (**a**) and in 100 m-radius zones  
726 (**b**).

**a: Aggregated 5 m-resolution land cover raster**

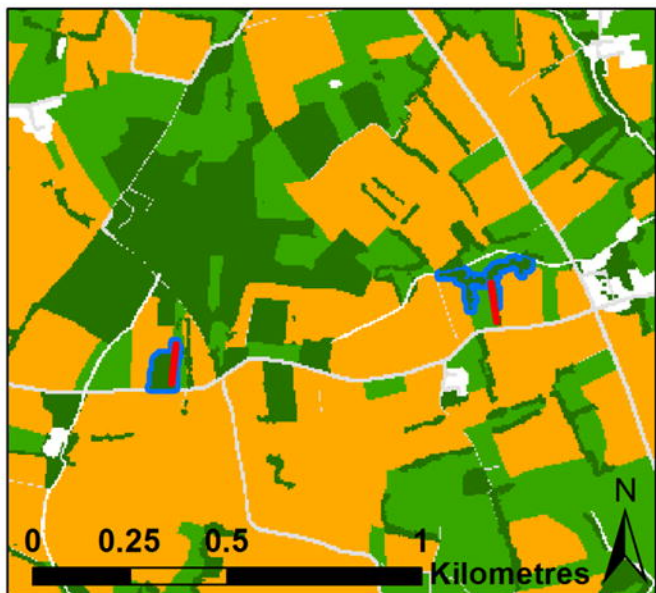

**b: Patches' connectivity (dPC) based on Euclidian distances (250 m)**

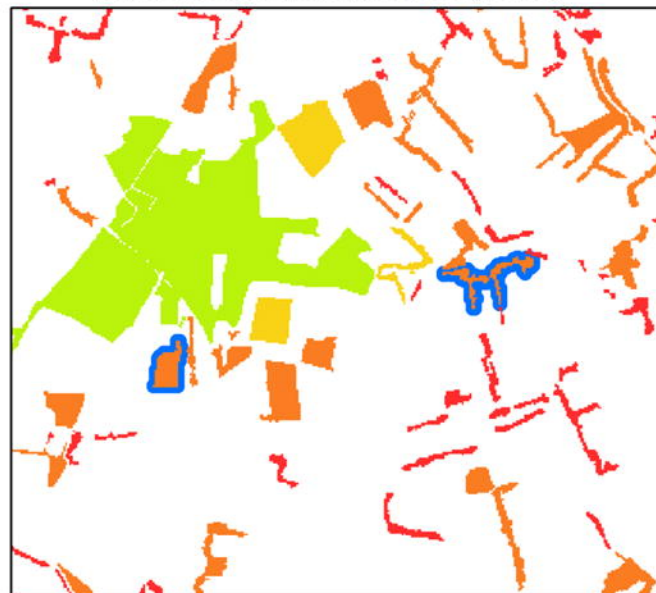

**c: Least cost paths and patches' connectivity (dPC) for the Wood mouse**

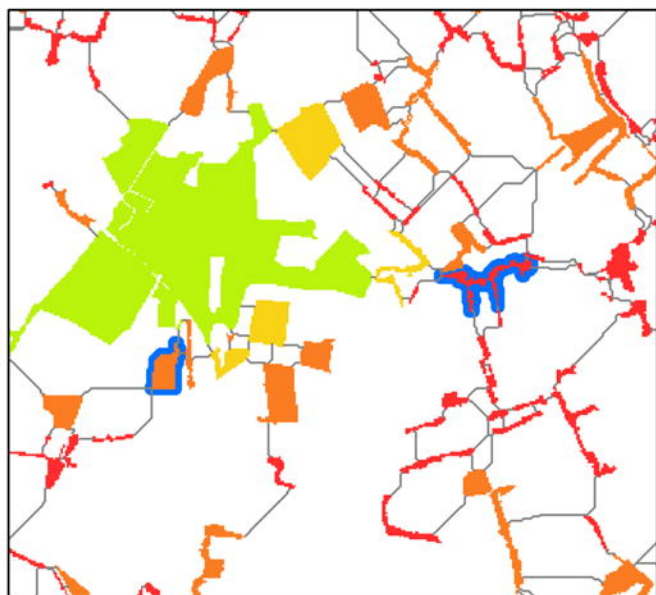

**d: Least cost paths and patches' connectivity (dPC) for the Bank vole**

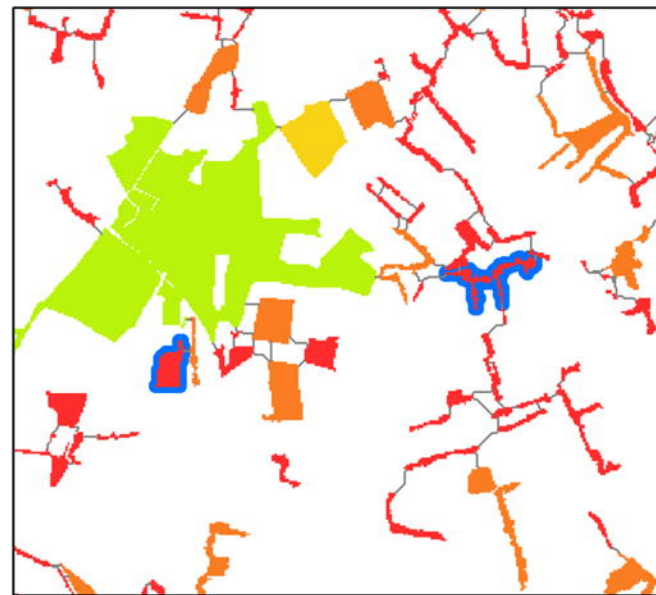

**Legend**

**Land covers for a.**

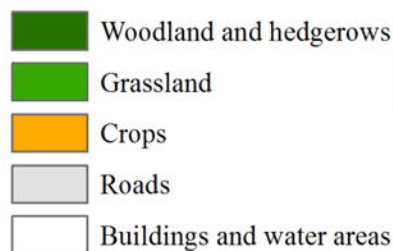

**Sampling sites**

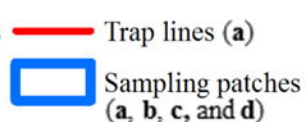

**Connectivity measures (dPC) for b, c and d.**

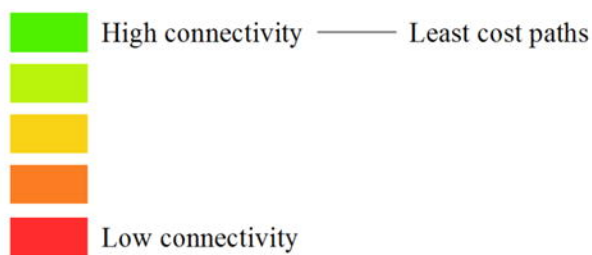

**Figure 1**

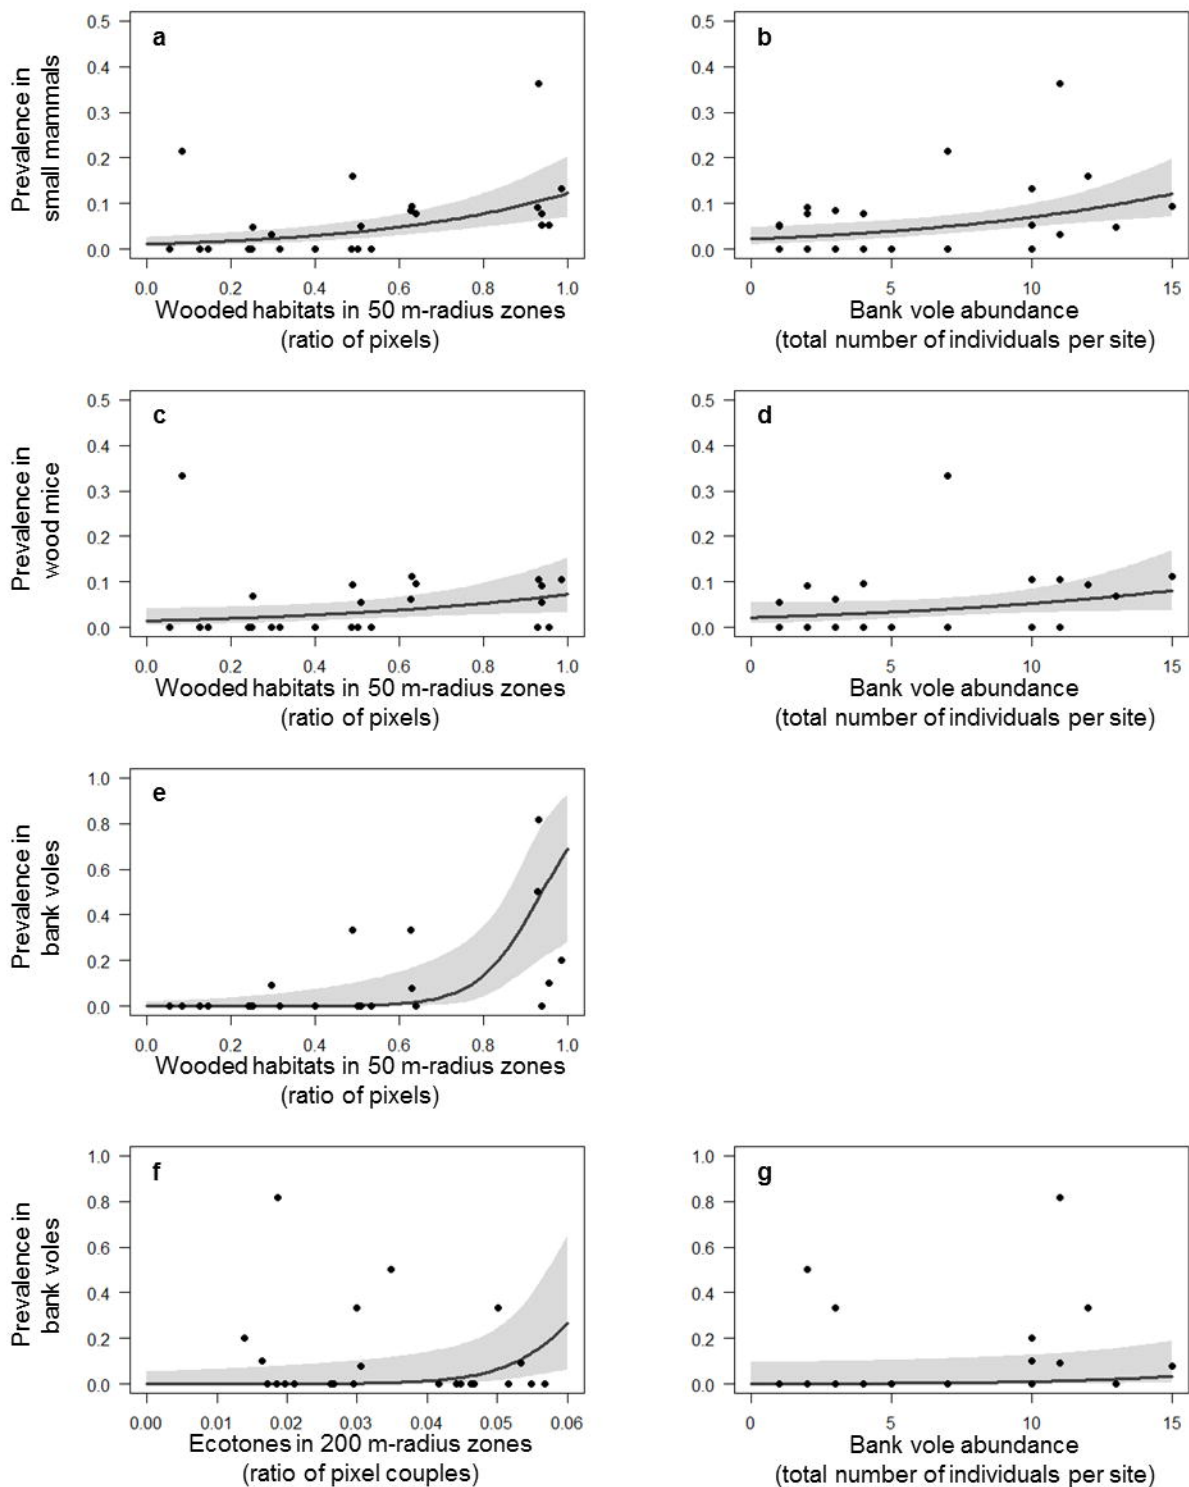

Figure 2

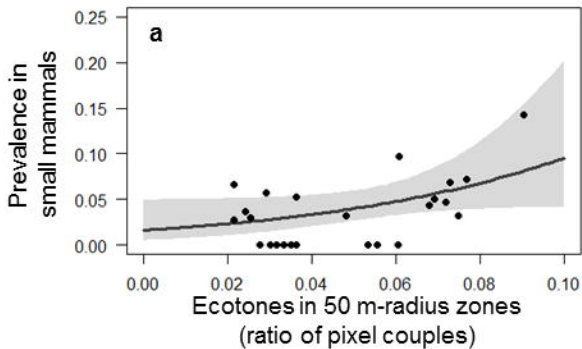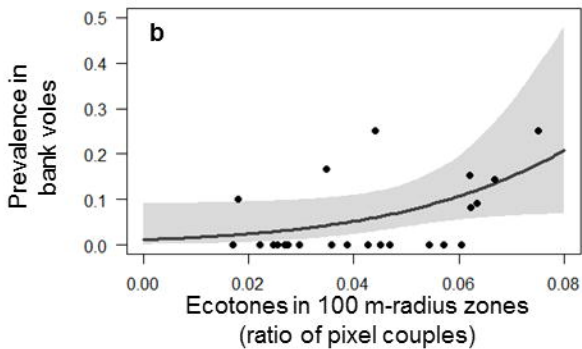

Figure 3
